# Supplementary material
Source: PubMed Central journal article supplement (PMC5009956)
Supplement: supp_msv204_ResubmitSupp.pdf [file supp_msv204_ResubmitSupp.pdf]

# Supplementary Information

Table S1: Rearrangements by chromosome

|             |     |     |
|-------------|-----|-----|
| Neanderthal | 1   | 122 |
|             | 2   | 172 |
|             | 3   | 61  |
|             | 4   | 111 |
|             | 5   | 31  |
|             | 6   | 19  |
|             | 7   | 202 |
|             | 8   | 27  |
|             | 9   | 122 |
|             | 10  | 132 |
|             | 11  | 66  |
|             | 12  | 22  |
|             | 13  | 48  |
|             | 14  | 31  |
|             | 15  | 69  |
|             | 16  | 145 |
|             | 17  | 133 |
|             | 18  | 44  |
|             | 19  | 36  |
|             | 20  | 110 |
|             | 21  | 107 |
|             | 22  | 27  |
| X           | 35  |     |
| Y           | 98  |     |
| Denisovan   | 1   | 128 |
|             | 2   | 252 |
|             | 3   | 99  |
|             | 4   | 180 |
|             | 5   | 36  |
|             | 6   | 43  |
|             | 7   | 283 |
|             | 8   | 39  |
|             | 9   | 119 |
|             | 10  | 233 |
|             | 11  | 82  |
|             | 12  | 58  |
|             | 13  | 28  |
|             | 14  | 37  |
|             | 15  | 67  |
|             | 16  | 215 |
|             | 17  | 124 |
|             | 18  | 73  |
|             | 19  | 66  |
|             | 20  | 132 |
|             | 21  | 136 |
|             | 22  | 39  |
| X           | 79  |     |
| Y           | 112 |     |

Table S2: Overrepresented Gene Ontology Categories

| Genome            | function    | EASE |
|-------------------|-------------|------|
| Altai Neanderthal | flotillin   | 1.27 |
| Denisovan         | keratin     | 1.28 |
|                   | microtubule | 1.17 |
|                   | flotillin   | 1.14 |
|                   | fibronectin | 1.13 |

Table S3: Genes with  $d_N/d_S > 1.0$

| Genome            | Gene            | $d_N$    | $d_S$    | $d_N/d_S$          |
|-------------------|-----------------|----------|----------|--------------------|
| Altai Neanderthal | ENSG00000214681 | 0.003584 | 0.000004 | 999.0 <sup>1</sup> |
|                   | ENSG00000184276 | 0.006455 | 0.000006 | 999.0 <sup>1</sup> |
|                   | ENSG00000186146 | 0.000002 | 0.000000 | 134.7              |
|                   | ENSG00000062096 | 0.004416 | 0.000004 | 999.0 <sup>1</sup> |
|                   | ENSG00000203780 | 0.000001 | 0.000001 | 1.2                |
|                   | ENSG00000132196 | 0.001461 | 0.000007 | 221.1              |
|                   | ENSG00000142794 | 0.005703 | 0.004413 | 1.3                |
| Denisovan         | ENSG00000184276 | 0.006455 | 0.000006 | 999.0 <sup>1</sup> |
|                   | ENSG00000203780 | 0.000001 | 0.000001 | 1.2                |
|                   | ENSG00000178852 | 0.004800 | 0.000044 | 109.7              |
|                   | ENSG00000196757 | 0.001320 | 0.000018 | 73.6               |

<sup>1</sup> 999.0 is the highest ratio of  $d_N/d_S$  that PAML reports. These results may be driven by the low estimates of  $d_S$ . There is no clear signature of misalignment in the data.

Table S4: Mean coverage in properly paired reads by chromosome

|             |    |         |
|-------------|----|---------|
| Neanderthal | 1  | 3.03442 |
|             | 2  | 3.11308 |
|             | 3  | 3.072   |
|             | 4  | 3.21629 |
|             | 5  | 3.11201 |
|             | 6  | 3.17608 |
|             | 7  | 3.09368 |
|             | 8  | 3.17866 |
|             | 9  | 3.00747 |
|             | 10 | 3.17219 |
|             | 11 | 2.96935 |
|             | 12 | 2.99443 |
|             | 13 | 3.16641 |
|             | 14 | 3.02113 |
|             | 15 | 2.93645 |
|             | 16 | 2.99368 |
|             | 17 | 2.77537 |
|             | 18 | 3.08382 |
|             | 19 | 2.58384 |
|             | 20 | 2.78167 |
|             | 21 | 3.23365 |
|             | 22 | 2.56239 |
|             | X  | 3.16043 |
| Denisovan   | 1  | 3.03442 |
|             | 2  | 3.11308 |
|             | 3  | 3.072   |
|             | 4  | 3.21629 |
|             | 5  | 3.11201 |
|             | 6  | 3.17608 |
|             | 7  | 3.09368 |
|             | 8  | 3.17866 |
|             | 9  | 3.00747 |
|             | 10 | 3.17219 |
|             | 11 | 2.96935 |
|             | 12 | 2.99443 |
|             | 13 | 3.16641 |
|             | 14 | 3.02113 |
|             | 15 | 2.93645 |
|             | 16 | 2.99368 |
|             | 17 | 2.77537 |
|             | 18 | 3.08382 |
|             | 19 | 2.58384 |
|             | 20 | 2.78167 |
|             | 21 | 3.23365 |
|             | 22 | 2.56239 |
|             | X  | 3.16043 |

Table S5: Y Coverage

| Genome      | Locus                          | Mean Coverage | Median Coverage | Standard Deviation |
|-------------|--------------------------------|---------------|-----------------|--------------------|
| Neanderthal | whole Y                        | 0.91          | 0               | 18.5               |
|             | within 1kb of Y-translocations | 74            | 14              | 220                |
| Denisovan   | whole Y                        | 0.56          | 0               | 12.5               |
|             | within 1kb of Y-translocation  | 52            | 7               | 160                |

Table S6: Human immortalized cell lines used to confirm rearrangements

| <u>Cell line</u> |
|------------------|
| HGDP00521        |
| HGDP00542        |
| HGDP00665        |
| HGDP00778        |
| HGDP00927        |
| HGDP00998        |
| HGDP01029        |
| HGDP01284        |
| HGDP01307        |
| <u>HGDP0456</u>  |

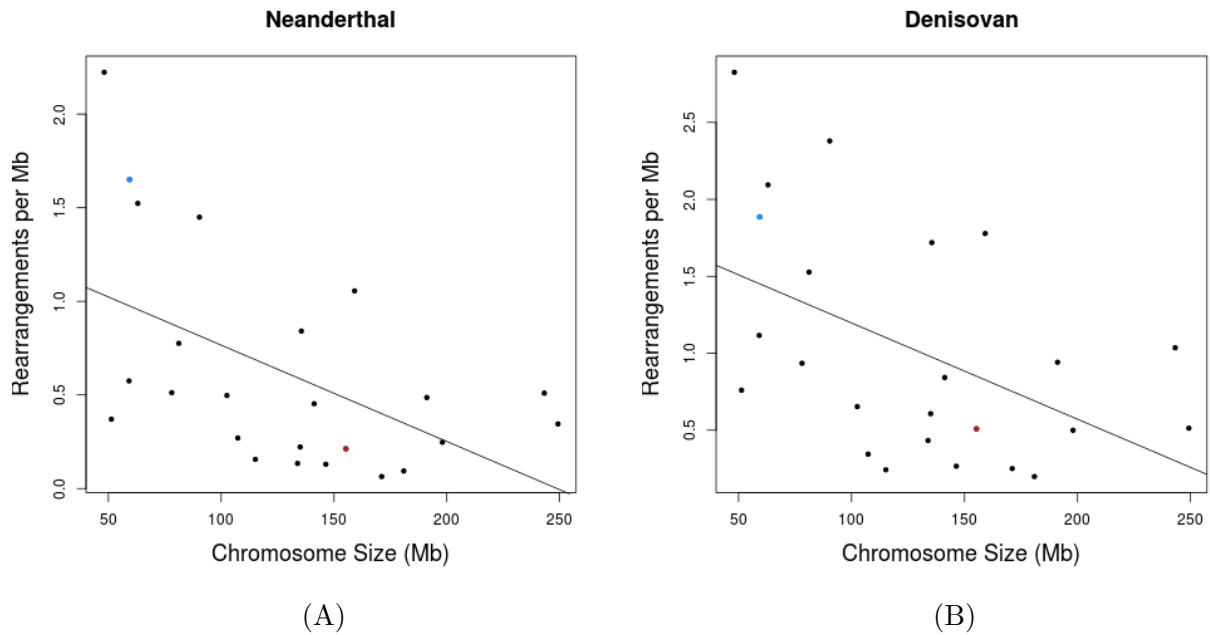

Figure S1: Incidence of rearrangements vs chromosome size for (A) Neanderthal and (B) Denisova. Both samples show a significant negative correlation between the rate of rearrangement and chromosome size (Neanderthal  $R^2 = 0.24$ ,  $P = 0.0088$ ; Denisovan  $R^2 = 0.20$ ,  $P = 0.016$ ). These results may suggest that ectopic recombination is more common for small chromosomes or that small chromosomes are degenerating. Rates of rearrangements are higher in Denisovan than Neanderthal, but chromosomes show consistent patterns across the two species. The X chromosome (red) does not appear to have an excess of rearrangements given its size, but the Y chromosome (blue) carries a large number of rearrangements per basepair, especially considering that there is no Y chromosome sequence present in these female individuals.



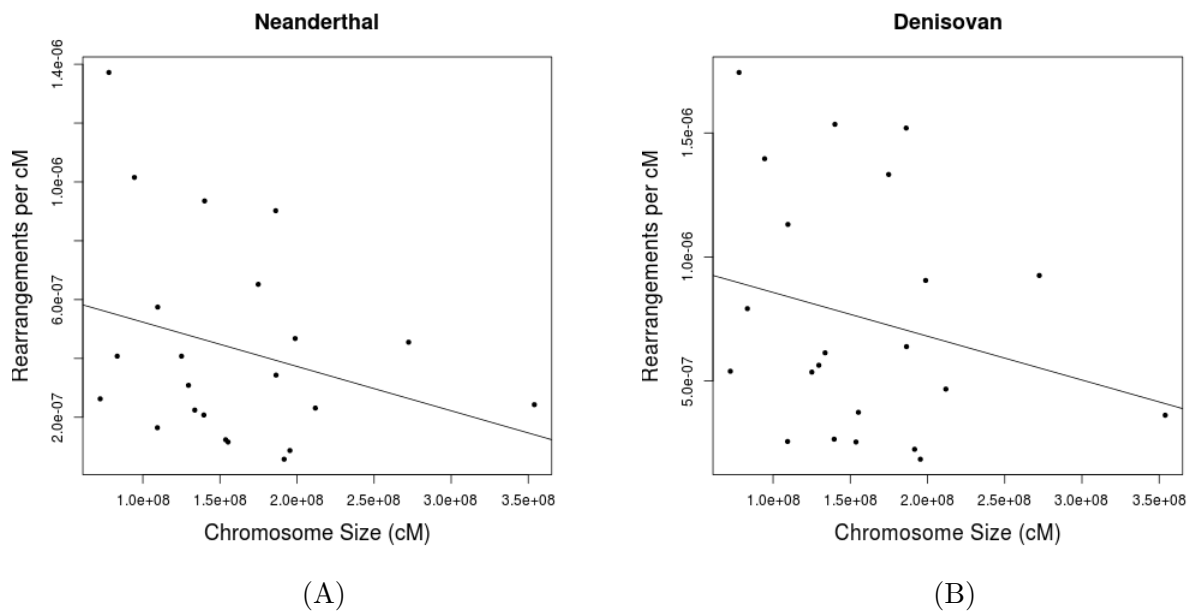

Figure S2: Rate of rearrangements vs chromosome size in centimorgans for (A) Neanderthal and (B) Denisova. There is no significant correlation between the rate of rearrangement and chromosome size (Neanderthal  $R^2 = 0.036$ ,  $P = 0.195$ ; Denisovan  $R^2 = 0.01$ ,  $P = 0.28$ ).

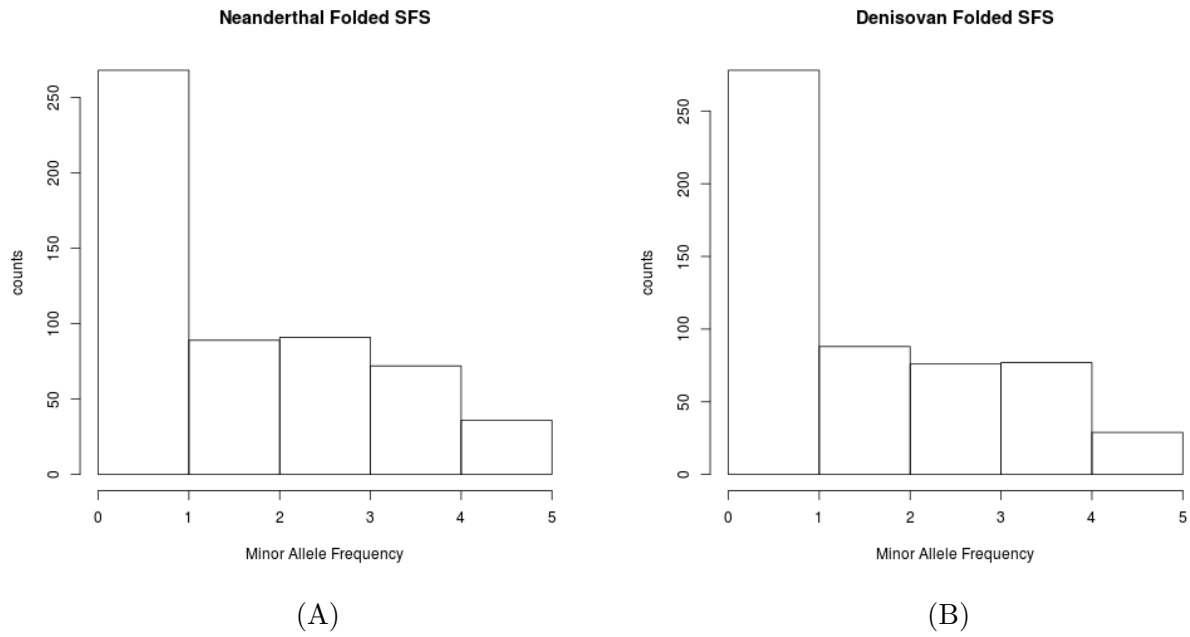

Figure S3: Folded presence-absence spectrum for genome structure changes identified in (A) Neanderthal and (B) Denisovan genomes assayed in a population of 10 individual modern humans. The presence-absence spectrum indicates a skew toward high and low frequency variants with fewer moderate frequency variants. There is no significant difference between the folded mutation spectrum for rearrangements identified in Neanderthals vs. Denisovan.

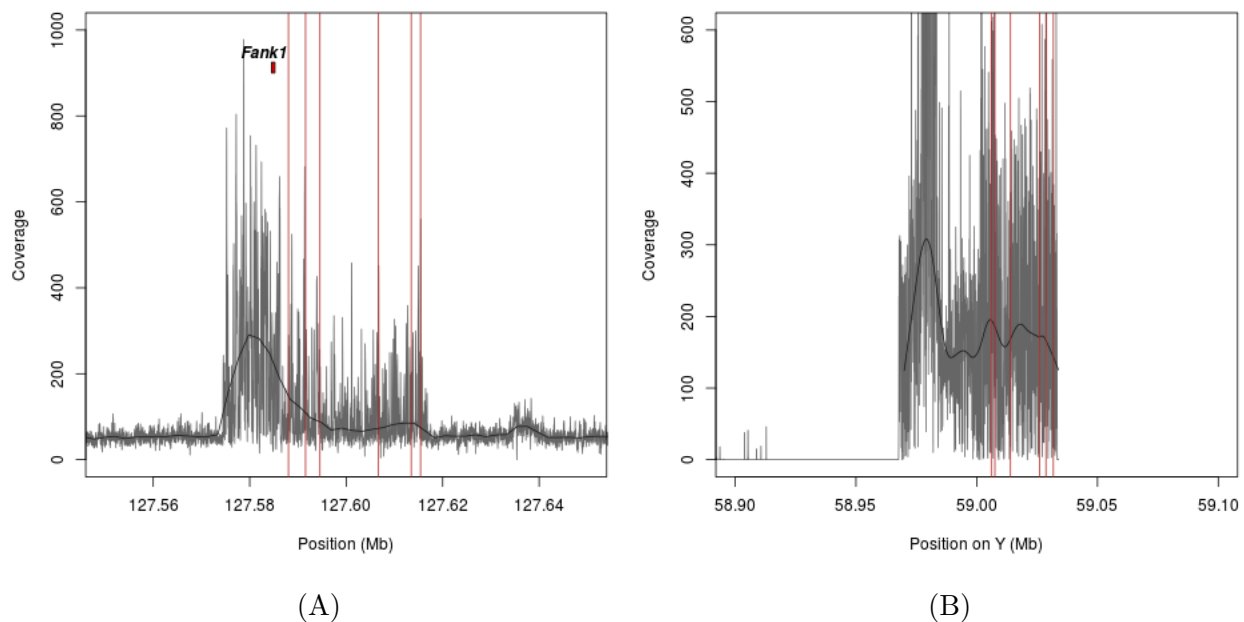

Figure S4: Genomic coverage with lowess smoothed regression line at the site of a rearrangement (A) at the *Fank1* locus and (B) on the translocated segment of the Y in the Altai Neanderthal. Locations of abnormally mapping read pairs that indicate junctions of rearrangements are shown in red. Coverage changes are consistent with 6 fold copy number variation, and coverage depth is variable across the region, consistent with multiple independent breakpoints indicated by the paired end read information.

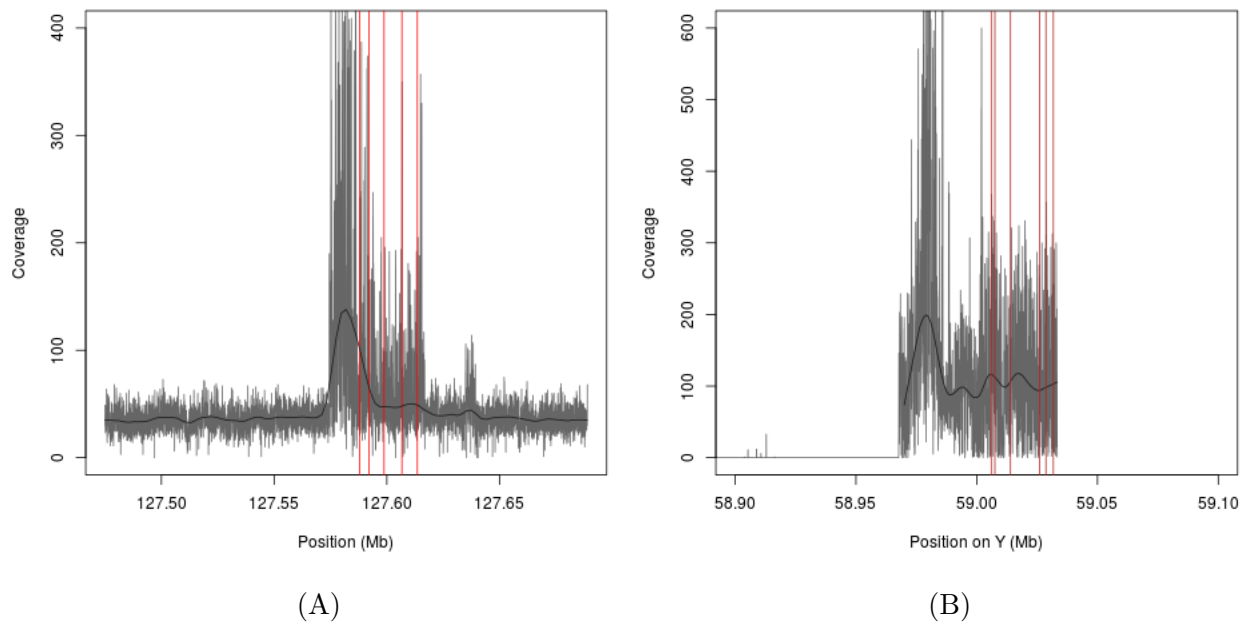

Figure S5: Genomic coverage with lowess smoothed regression line at the site of a rearrangement (A) at the *Fank1* locus and (B) on the translocated segment of the Y in Denisovan. Locations of abnormally mapping read pairs that indicate junctions of rearrangements are shown in red.

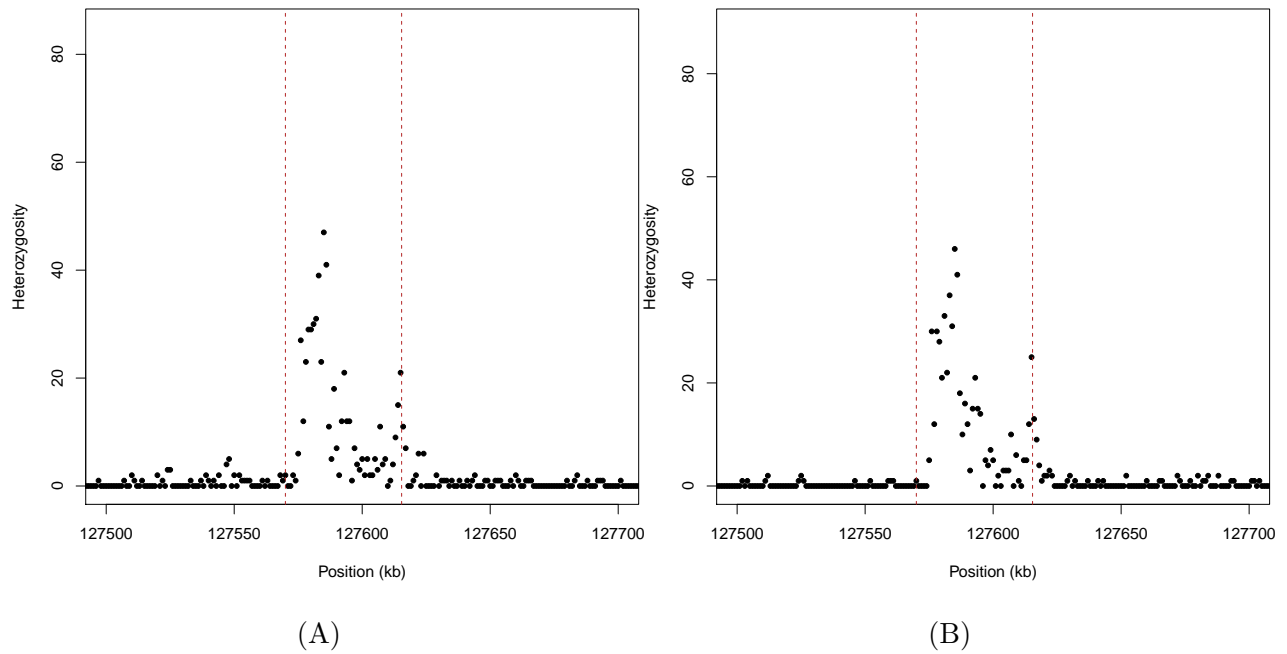

Figure S6: Heterozygosity for 1 kb windows surrounding the duplicated first exon of *Fank1* in (A) Neanderthal and (B) Denisovan. Boundaries of the duplication inferred from coverage data and abnormally mapping read pairs is shown in red. Heterozygosity for the region is abnormally high, a signature of paralogs accumulating mutations and diverging over time. Heterozygosity is highest in the regions with higher copy number status and return to normal levels outside the duplicated region in *Fank1*.

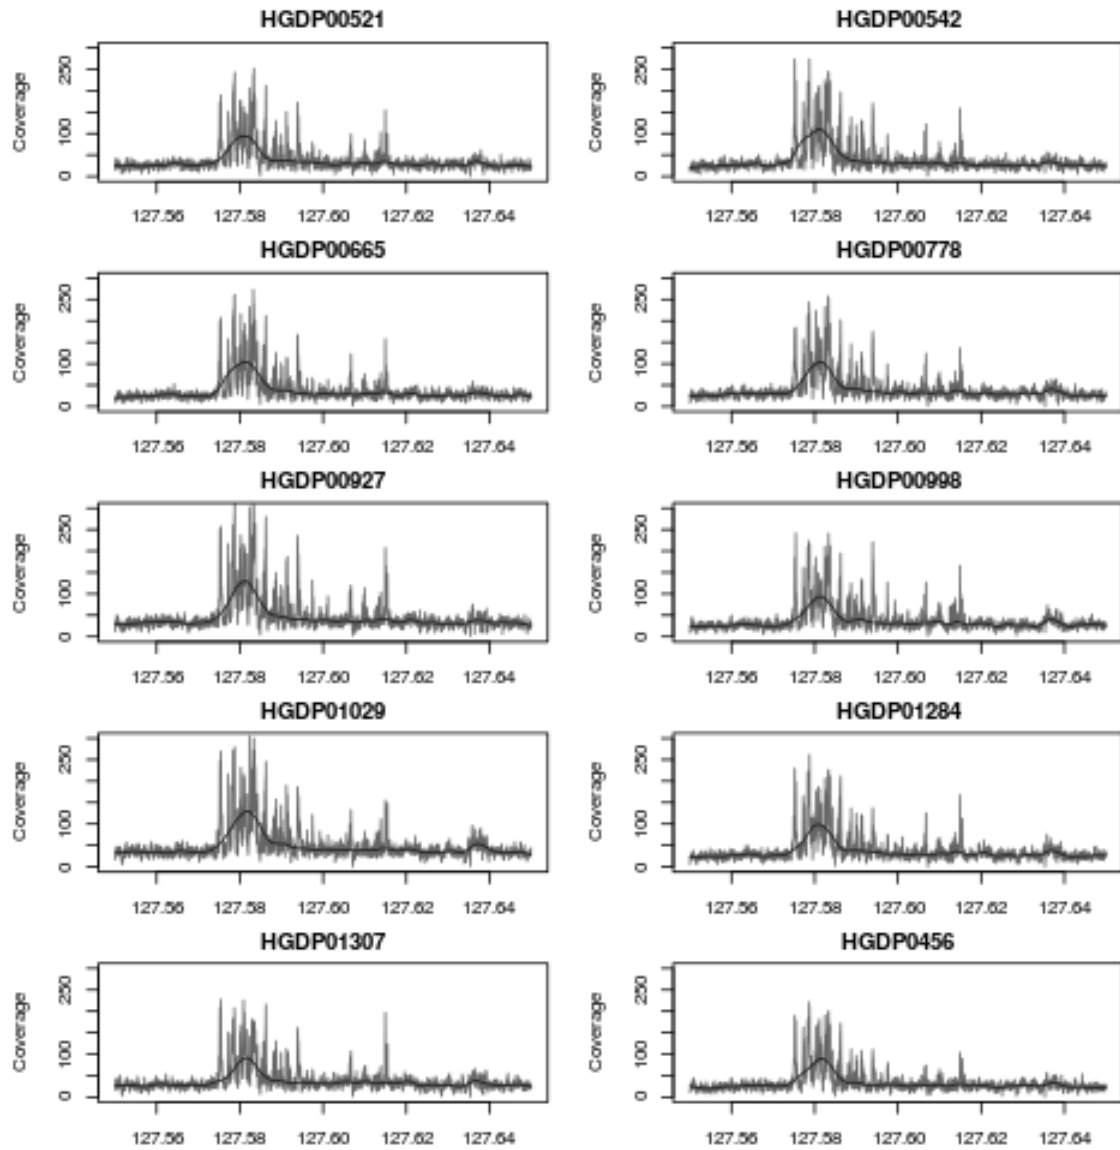

Figure S7: Genomic coverage depth for the translocated segment of the chromosome 10 for 10 modern human genomes. Modern humans show increased coverage consistent with multiple copies for the region.

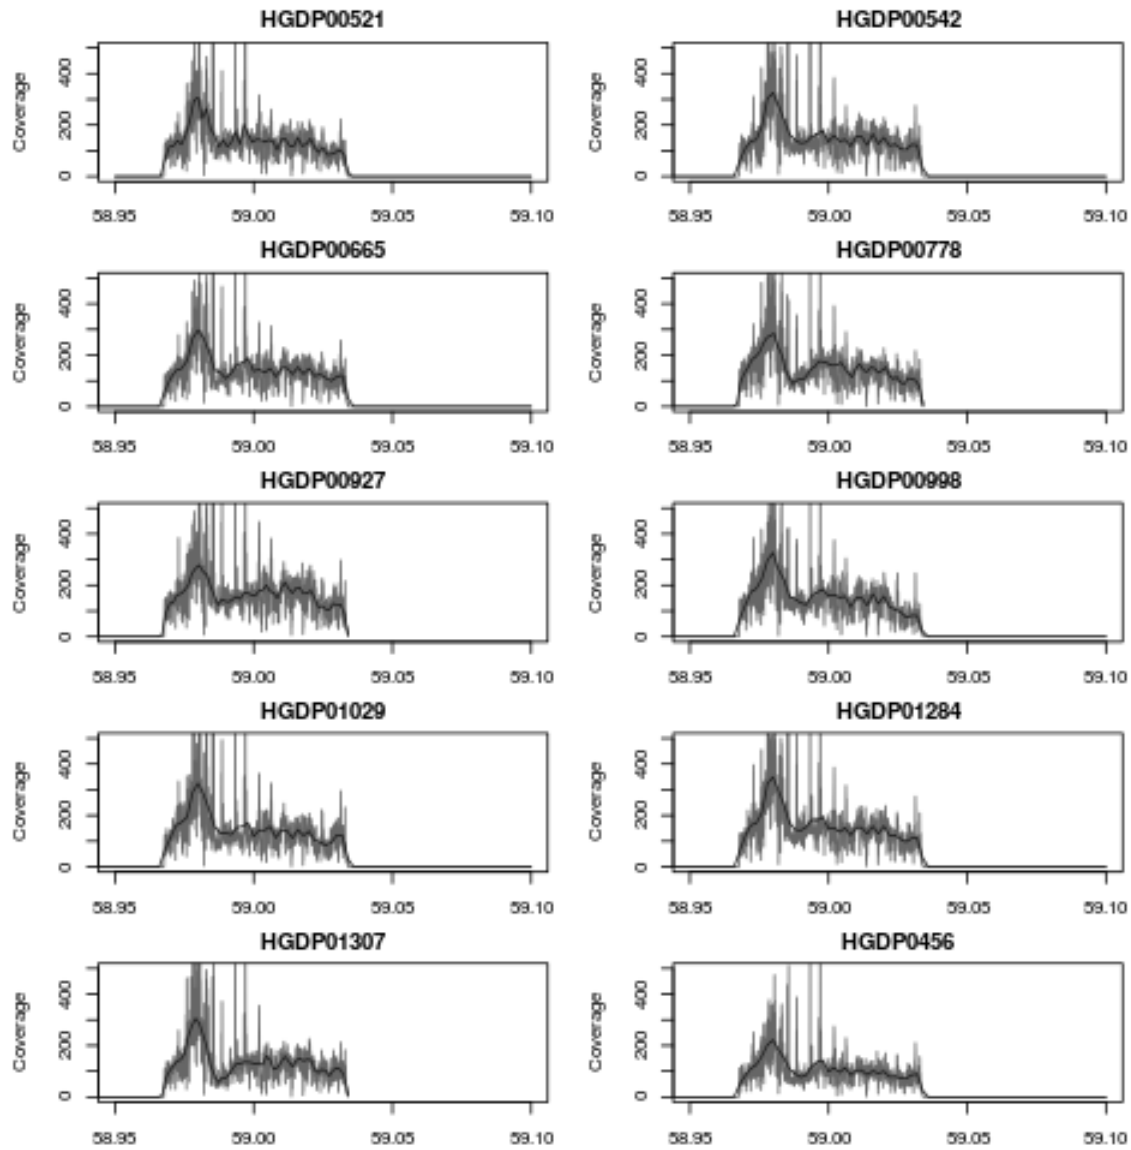

Figure S8: Genomic coverage depth for the translocated segment of the Y in 10 modern human genomes. Modern humans show increased coverage consistent with multiple copies for the region.

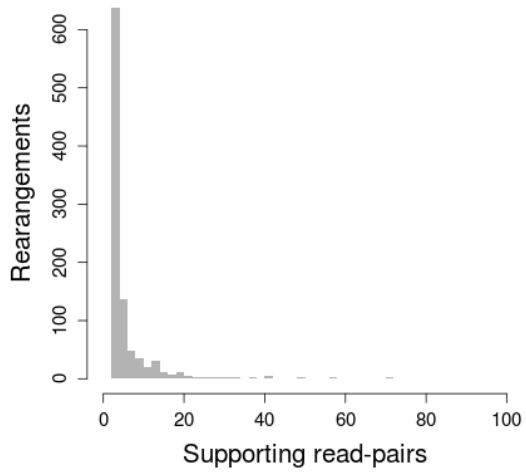

(A)

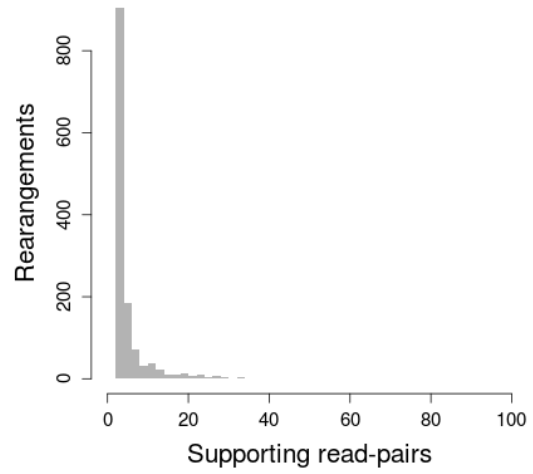

(B)

Figure S9: Read pairs supporting genome structure changes identified in (A) Neanderthal and (B) Denisovan genomes.
